# Supplementary material for: Multi-Omics Study on Molecular Mechanisms of Single-Atom Fe-Doped Two-Dimensional Conjugated Phthalocyanine Framework for Photocatalytic Antibacterial Performance
Source: MDPI journal article supplement (doi:10.3390/molecules29071601), 2024-04-03

## **Supplementary material**

### **Multi-omics Study on Molecular Mechanisms of Single-Atom Fe-Doped Two-Dimensional Conjugated Phthalocyanine Framework for Photocatalytic Antibacterial Performance**

Shihong Diao<sup>1</sup>, Yixin Duan<sup>1</sup>, Mengying Wang<sup>1</sup>, Yuanjiao Feng<sup>2\*</sup>, Hong Miao<sup>1\*</sup>,  
Yongju Zhao<sup>1\*</sup>

<sup>1</sup>College of Animal Science and Technology, Southwest University; Chongqing Key  
Laboratory of Herbivore Science, Chongqing 400715, China

<sup>2</sup>Chongqing Medical and Pharmaceutical College, Chongqing 401331, China

\*Correspondence authors: E-mail addresses: fengyuanj88@126.com (Y. Feng),  
miaoh333@swu.edu.cn (H. Miao), zyongju@163.com (Y. Zhao).

## 1. Materials and methods

1.1. The specific reaction system for PCR as follow:

1  $\mu$ L 27F upstream primer, 1  $\mu$ L 1492R downstream primer, 2  $\mu$ L DNA template, 8  $\mu$ L  $2 \times$  TaqPCRMix, and 8  $\mu$ L ddH<sub>2</sub>O were added in sequence. The PCR reaction conditions were set as follows: denaturation at 95°C for 3 min, denaturation at 95°C for 30 sec, annealing at 56°C for 45 sec, extension at 72°C for 2 min, cycling for 40 cycles, and extension at 72°C for 10 min at the end of the last cycle.

1.2. The prepared method of transcriptomics samples as follow:

The samples were centrifuged at 8000 rpm for 5 min to obtain the bacterial precipitate, cleaned them three times with PBS, and finally the samples were snap frozen in liquid nitrogen.

## 2. Figure S1 to S7

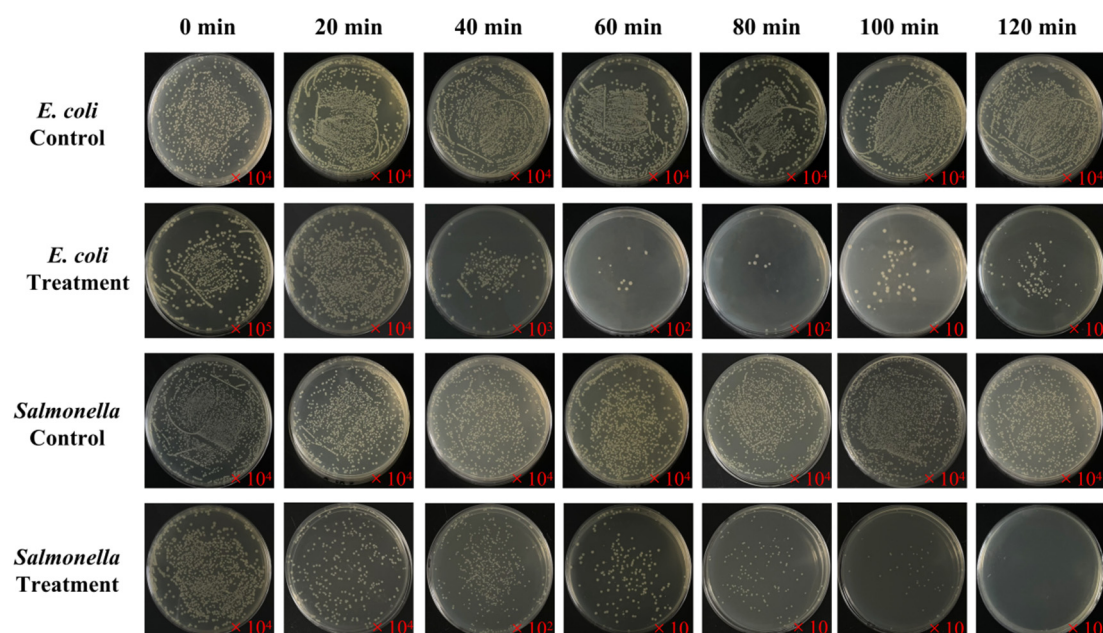

**Figure S1** Antibacterial assessments. Images of the bacterial colonies formed by *E. coli* and *S. enteritidis* with different treatment times of CPF-Fe.

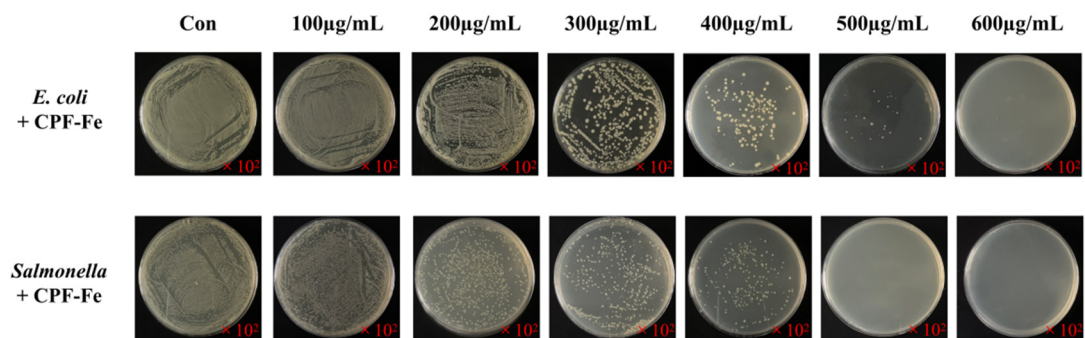

**Figure S2** Antibacterial assessments. Images of the bacterial colonies formed by *E. coli* and *S. enteritidis* with different concentrations of CPF-Fe.

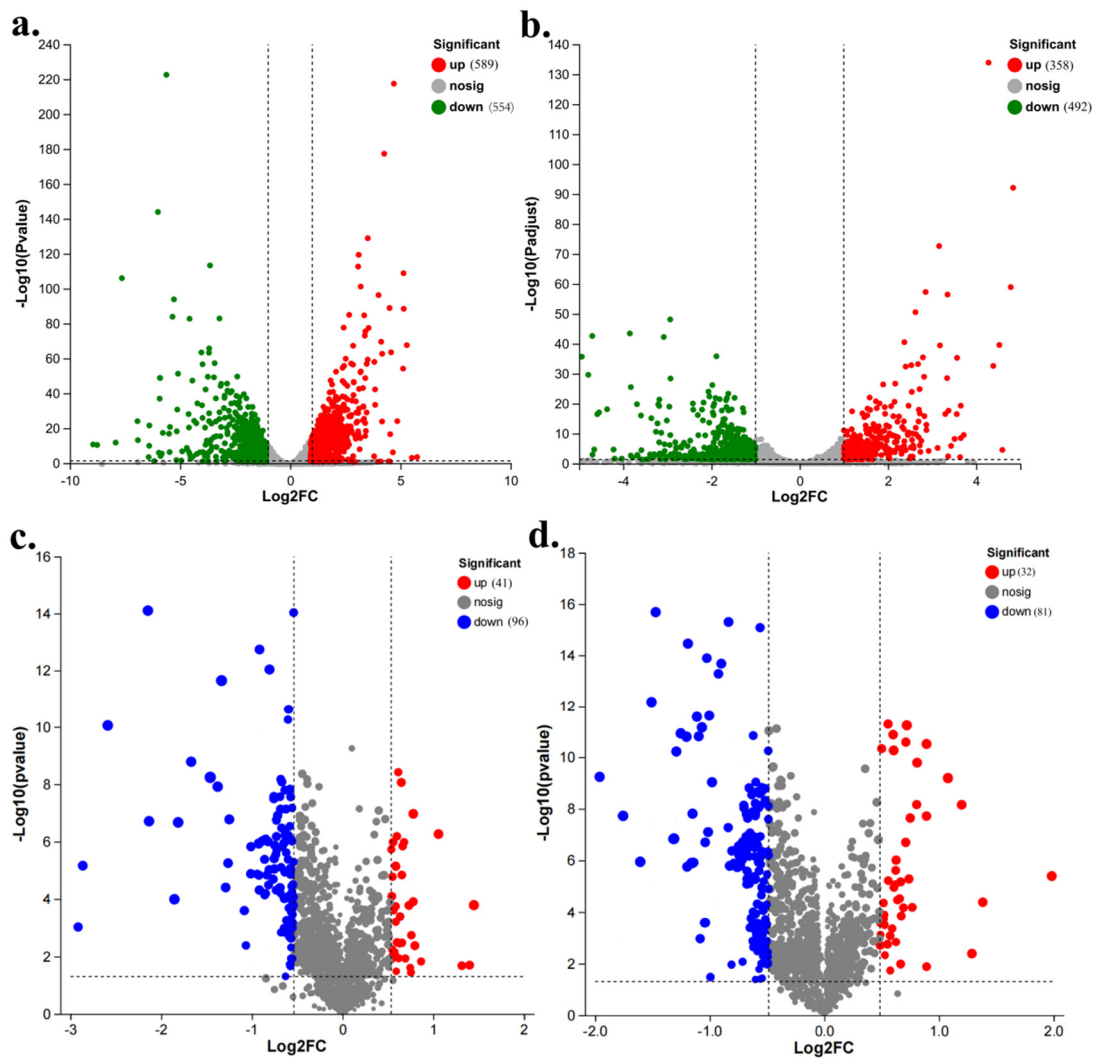

**Figure S3** Transcriptomics and metabolomic response. The volcano plot of differentially expressed genes in *E. coli* (a) and *S. enteritidis* (b). The volcano plot of differential metabolites in *E. coli* (c) and *S. enteritidis* (d).

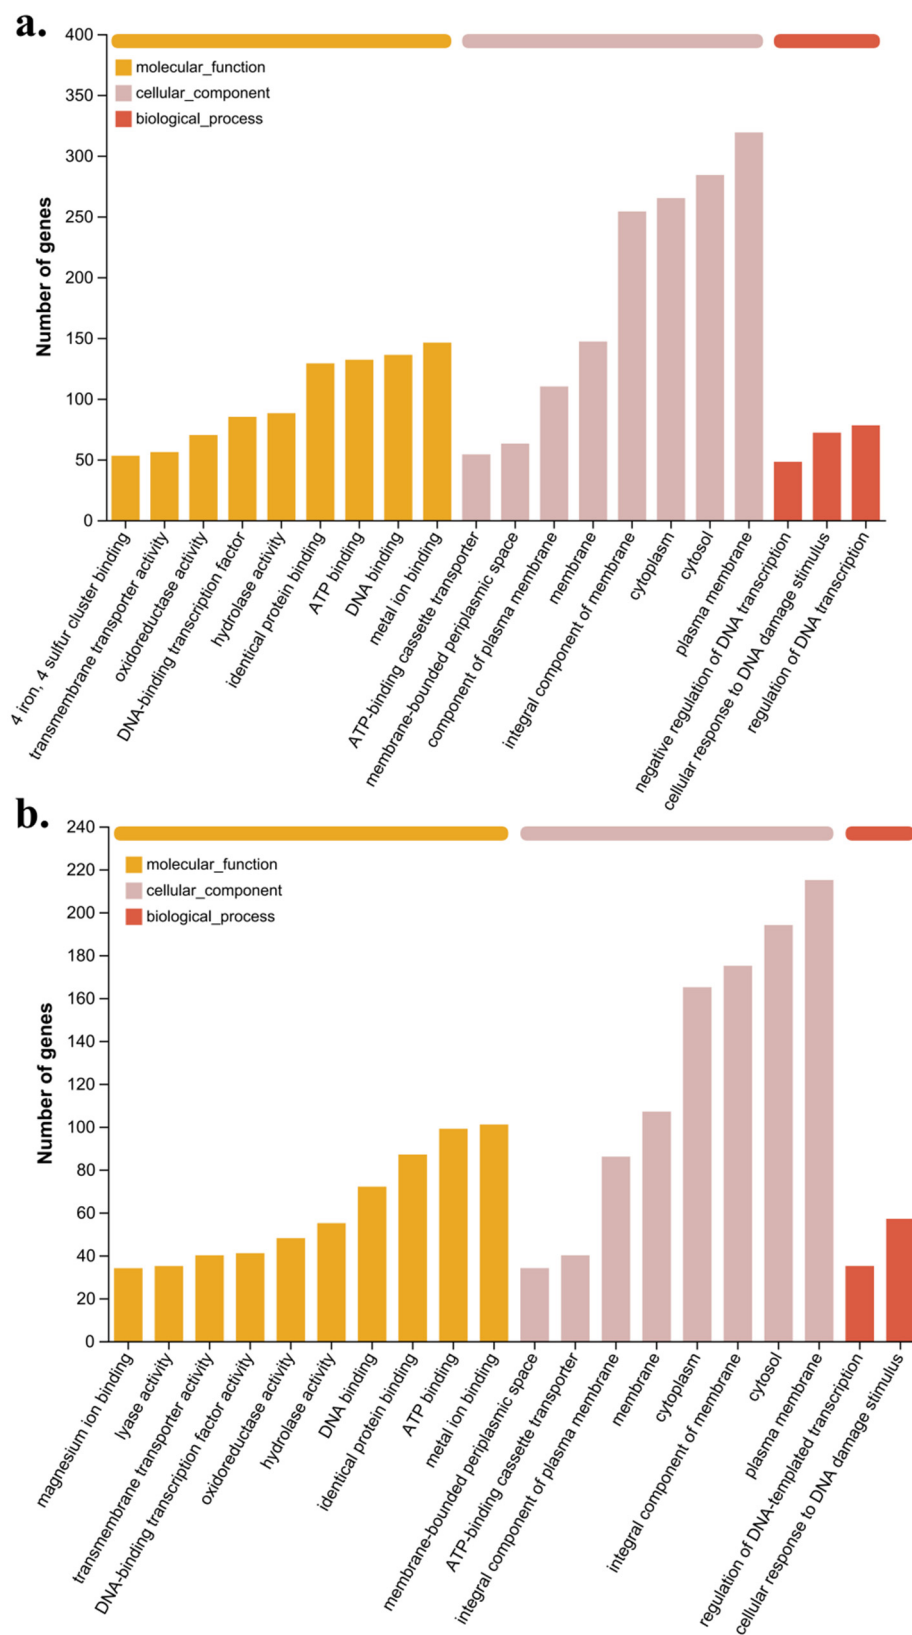

**Figure S4** Transcriptomics response. **(a)** GO annotation maps of differentially expressed genes in *E. coli* after CPF-Fe treatment. **(b)** GO annotation maps of differentially expressed genes in *S. enteritidis* after CPF-Fe treatment.

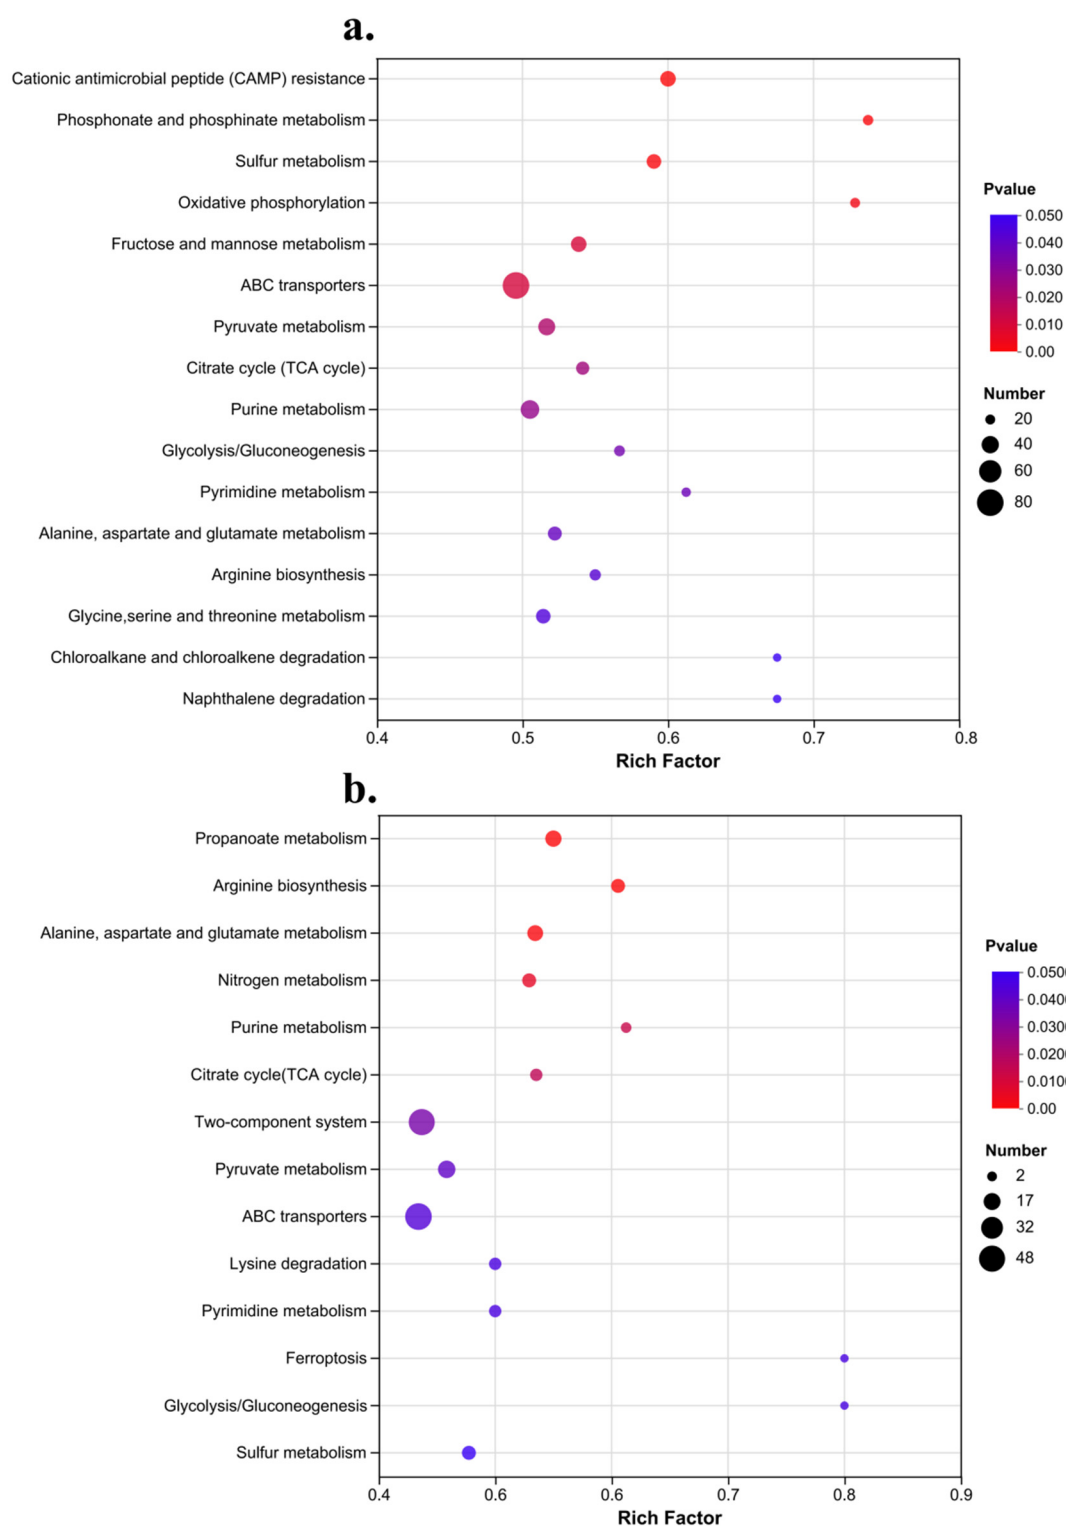

**Figure S5** Transcriptomics response. **(a)** KEGG-enriched scatter plot of differentially expressed genes in *E. coli* after treatment with CPF-Fe. **(b)** KEGG-enriched scatter plot of differentially expressed genes in *S. enteritidis* after treatment with CPF-Fe.

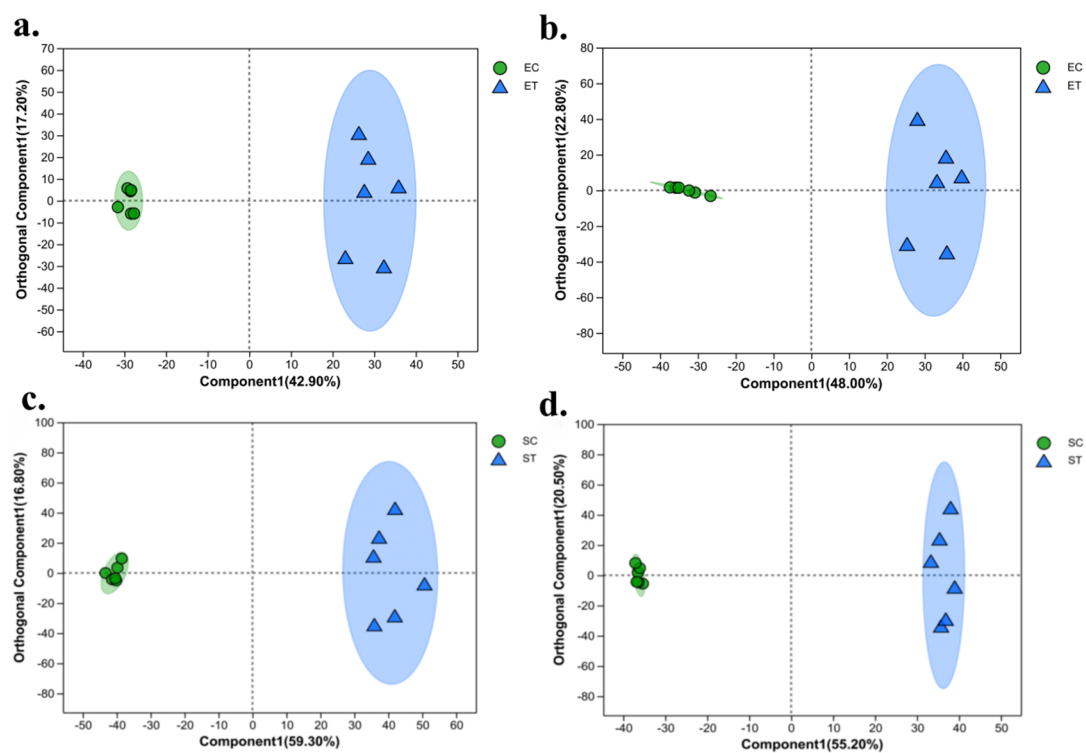

**Figure S6** Metabolomics response. *E. coli* positive (a) and negative (b) OPLS-DA score plot. *S. enteritidis* positive (c) and negative (d) OPLS-DA score plot.

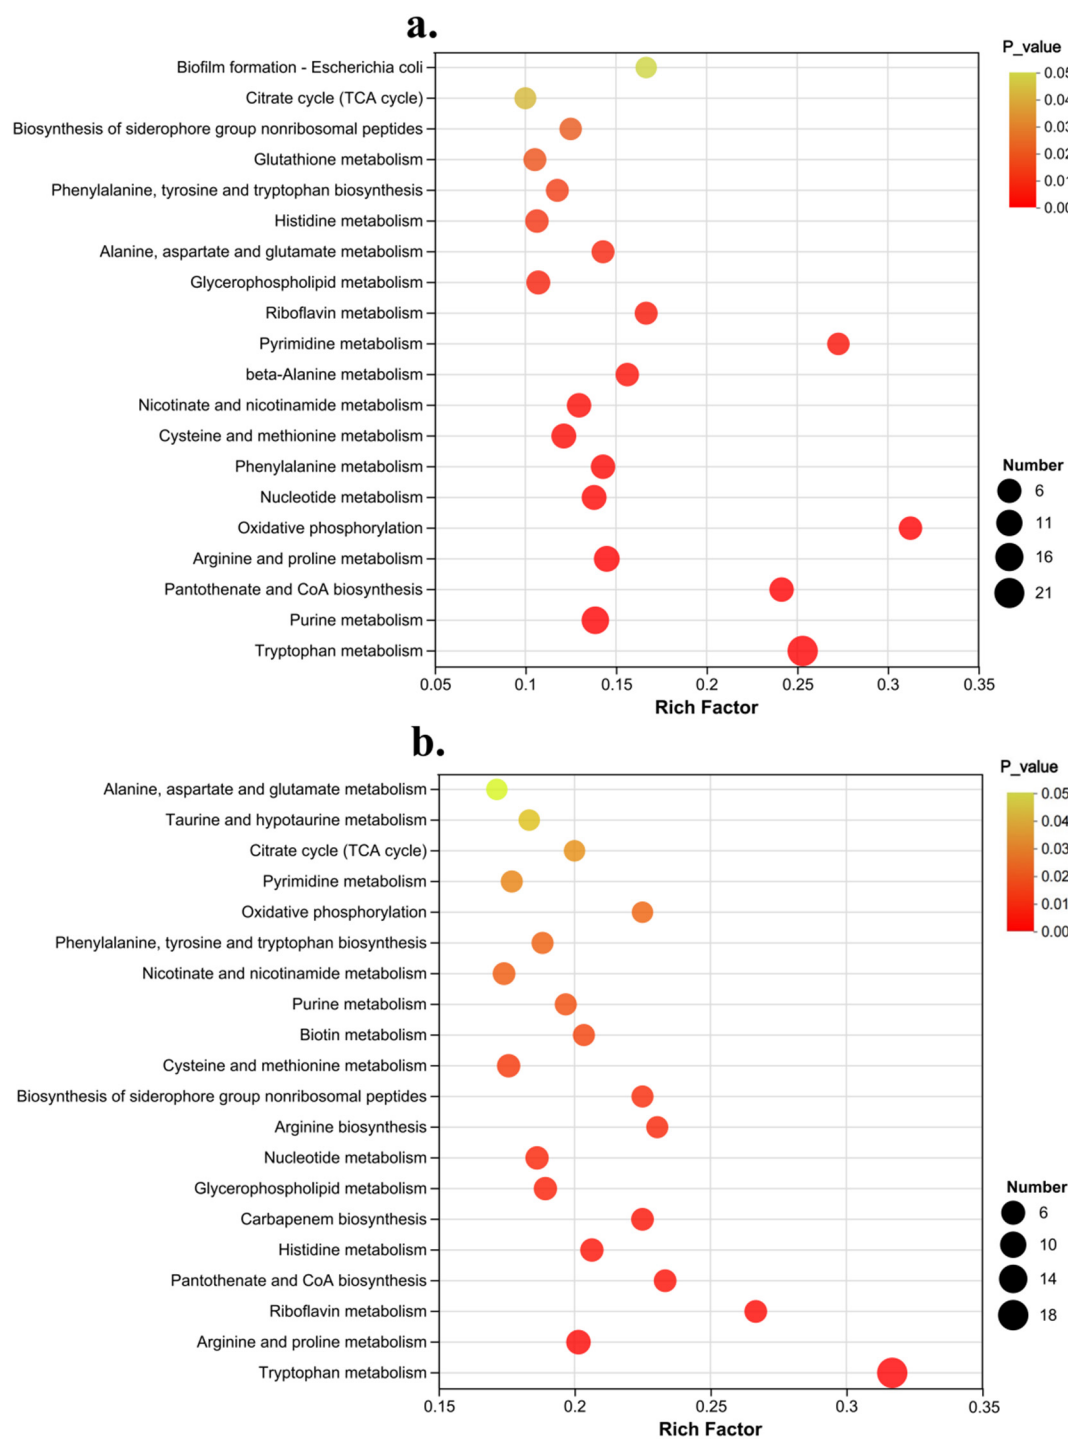

Supplement: s1 [file s1]
