# Supplementary material for: Multi-Omics Study on Molecular Mechanisms of Single-Atom Fe-Doped Two-Dimensional Conjugated Phthalocyanine Framework for Photocatalytic Antibacterial Performance
Source: Molecules. 2024 Apr 3;29(7):1601. doi: 10.3390/molecules29071601 (PMC11013413; doi:10.3390/molecules29071601)
Supplement: Supplementary file 1 [file molecules-29-01601-s001.zip › Supplementary material-2.xlsx]

## Sheet: Table S1
Table S1 Differentially expressed genes of E. coli and S. enteritidis treated with CPF-Fe
Gene_id	Gene name	Gene description	Salmonella enteritidis				Escherichia coli
			FC(Experimental/Control)	P-value	Regulate	Significant	FC(Experimental/Control)	P-value	Regulate	Significant
Oxidative stress related genes
b3961	oxyR	DNA-binding transcriptional dual regulator OxyR	2.691	9.96817e-07	up	yes	2.969	5.18802e-11	up	yes
b2582	trxC	reduced thioredoxin 2	2.82	0.00861656	up	yes	2.529	1.21353e-05	up	yes
b0014	dnaK	chaperone protein DnaK	0.342	1.10084e-13	down	yes	0.471	8.03834e-10	down	yes
b2741	rpoS	RNA polymerase sigma factor RpoS	0.313	2.13417e-10	down	yes	0.368	1.16886e-24	down	yes
b2699	recA	DNA recombination/repair protein RecA	6.506	1.73943e-20	up	yes	3.468	2.57753e-27	up	yes
b4043	lexA	DNA-binding transcriptional repressor LexA	6.469	2.27331e-16	up	yes	3.786	1.30759e-48	up	yes
b1019	efeB	heme-containing peroxidase/deferrochelatase	0.38	1.79376e-06	down	yes	0.415	0.0115105	down	yes
b1656	sodB	superoxide dismutase (Fe)	0.48	0.0101694	down	yes	0.389	0.0124588	down	yes
b1646	sodC	superoxide dismutase (Cu-Zn)	0.343	1.37907e-20	down	yes	0.342	0.0247967	down	yes
b2688	gshA	glutamate--cysteine ligase	0.441	0.00139471	down	yes	0.391	3.44486e-09	down	yes
b0581	ybdK	putative glutamate--cysteine ligase 2	0.463	0.00486328	down	yes	0.458	8.1363e-06	down	yes
b4239	treC	trehalose-6-phosphate hydrolase	4.088	0.000175814	up	yes	4.774	9.26052e-13	up	yes
b4240	treB	trehalose-specific PTS enzyme IIBC component	3.921	4.94503e-05	up	yes	4.748	2.70572e-30	up	yes
b2962	yggX	putative Fe(2(+))-trafficking protein	2.127	0.0010535	up	yes	1.079	0.648009	up	no
b2302	yfcG	disulfide bond oxidoreductase YfcG	0.434	0.00365266	down	yes	0.927	0.620593	down	no
Membrane related genes
b3189	murA	UDP-N-acetylglucosamine 1-carboxyvinyltransferase	0.452	0.00342051	down	yes	0.421	2.82277e-09	down	yes
b3972	murB	UDP-N-acetylenolpyruvoylglucosamine reductase	0.433	0.000593676	down	yes	0.438	0.0499731	down	yes
b0091	murC	UDP-N-acetylmuramate--L-alanine ligase	0.396	1.06283e-05	down	yes	0.408	9.06336e-11	down	yes
b0088	murD	UDP-N-acetylmuramoyl-L-alanine--D-glutamate ligase	0.461	9.32965e-08	down	yes	0.447	6.39629e-05	down	yes
b0090	murG	N-acetylglucosaminyl transferase	0.456	0.000559177	down	yes	0.387	6.60668e-08	down	yes
b0181	lpxA	acyl-[acyl-carrier-protein]--UDP-N-acetylglucosamine O-acyltransferase	0.461	0.00863409	down	yes	0.383	8.52902e-05	down	yes
b0182	lpxB	lipid A disaccharide synthase	0.431	0.00715259	down	yes	0.47	0.000228137	down	yes
b0915	lpxK	tetraacyldisaccharide 4'-kinase	0.379	9.22733e-05	down	yes	0.482	0.00431893	down	yes
b0929	ompF	outer membrane porin F	5.14	1.98892e-16	up	yes	9.007	7.26562e-114	up	yes
b2215	ompC	outer membrane porin C	0.492	7.66842e-05	down	yes	0.224	8.34784e-27	down	yes
b2129	yehX	glycine betaine ABC transporter ATP binding subunit YehX	1.395	0.130362	down	yes	0.357	0.0234873	down	yes
b2130	yehY	glycine betaine ABC transporter membrane subunit YehY	0.412	0.000333906	down	yes	0.404	9.63333e-06	down	yes
b2957	ansB	L-asparaginase 2	0.357	0.016551	down	yes	1.527	0.0742538	up	no
b0115	ptuA	pyruvate dehydrogenase%2C E2 subunit	0.295	3.89151e-15	down	yes	-	-	-	-
Amino acid and protein related genes
b3984	rplA	50S ribosomal subunit protein L1	0.458	0.00170908	down	yes	0.234	5.78531e-21	down	yes
b3231	rplM	50S ribosomal subunit protein L13	0.405	0.0022377	down	yes	0.412	1.29225e-12	down	yes
b3983	rplK	50S ribosomal subunit protein L11	0.449	0.0233537	down	yes	0.411	6.20205e-12	down	yes
b3312	rpmC	50S ribosomal subunit protein L29	0.333	0.0051066	down	yes	0.385	1.02941e-10	down	yes
b3703	rpmH	50S ribosomal subunit protein L34	0.416	0.00734083	down	yes	0.412	0.000345967	down	yes
b4200	rpsF	30S ribosomal subunit protein S6	0.302	1.6671e-06	down	yes	0.327	9.38792e-22	down	yes
b3341	rpsG	30S ribosomal subunit protein S7	0.308	3.41076e-15	down	yes	0.392	7.78975e-06	down	yes
b3165	rpsO	30S ribosomal subunit protein S15	0.427	8.17969e-10	down	yes	0.325	1.83165e-33	down	yes
b3230	rpsI	30S ribosomal subunit protein S9	0.318	3.41449e-06	down	yes	0.314	3.04455e-17	down	yes
b3168	infB	translation initiation factor IF-2beta'	0.687	0.0363442	down	no	0.397	0.0140911	down	yes
b1718	infC	translation initiation factor IF-3	0.541	0.00252384	down	no	0.344	0.00808563	down	yes
b3339	tufA	translation elongation factor Tu 1	0.572	0.00290375	down	no	0.435	0.000900522	down	yes
Nucleic acid synthesis related genes
b3701	dnaN	beta sliding clamp	0.351	1.55381e-05	down	yes	0.373	4.20412e-20	down	yes
b3066	dnaG	DNA primase	0.476	0.030765	down	yes	0.492	7.75007e-13	down	yes
b0184	dnaE	DNA polymerase III subunit alpha	0.479	0.0304751	down	yes	0.469	3.86947e-10	down	yes
b0014	dnaK	chaperone protein DnaK	0.342	1.10084e-13	down	yes	0.471	8.03834e-10	down	yes
b0183	rnhB	RNase HII	0.403	0.00199283	down	yes	0.402	1.61859e-05	down	yes
b2518	ndk	nucleoside diphosphate kinase	2.401	0.000207154	up	yes	2.308	0.168937	up	yes
b0474	adk	adenylate kinase	2.201	0.00171269	up	yes	2.072	0.78656	up	yes
b1839	APRT	adenine phosphoribosyltransferase	2.02	0.00331573	up	yes	2.252	0.479245	up	yes
b0860	AK	adenylate kinase	0.315	8.24665e-24	down	yes	0.4	0.465609	down	yes
b2498	upp	uracil phosphoribosyltransferase	0.318	3.84559e-12	down	yes	0.402	3.73689e-06	down	yes
b2508	guaB	inosine 5'-monophosphate dehydrogenase	0.412	0.00331636	down	yes	0.39	1.41421e-08	down	yes
b4245	pyrB	aspartate carbamoyltransferase catalytic subunit	0.404	0.000272843	down	yes	0.477	0.290685	down	yes
b0945	pyrD	dihydroorotate dehydrogenase%2C type 2	0.409	0.00725008	down	yes	0.22	2.42778e-09	down	yes
b1281	pyrF	orotidine-5'-phosphate decarboxylase	0.454	0.00515957	down	yes	0.244	1.39037e-10	down	yes
b3642	pyrE	orotate phosphoribosyltransferase	0.497	0.0184665	down	yes	0.392	3.05107e-08	down	yes
b4374	yjjG	pyrimidine 5'-nucleotidase YjjG	0.424	0.0295905	down	yes	0.51	1.32081e-07	down	no
Energy metabolism related genes
b4025	pgi	glucose-6-phosphate isomerase	0.371	1.42419e-07	down	yes	0.479	0.011458	down	yes
b3916	pfkA	6-phosphofructokinase 1	0.403	0.000133739	down	yes	0.48	7.10348e-07	down	yes
b1779	gapA	glyceraldehyde-3-phosphate dehydrogenase A	0.494	7.76441e-07	down	yes	0.405	0.0760544	down	yes
b0688	pgm	phosphoglucomutase	0.454	0.00585936	down	yes	0.465	0.178553	down	yes
b2779	eno	enolase	0.473	2.34504e-05	down	yes	0.45	4.49954e-09	down	yes
b1676	pykF	pyruvate kinase 1	0.465	0.00564371	down	yes	0.484	1.06e-05	down	yes
b0728	sucC	succinyl-CoA synthetase subunit beta	1.73	0.000113733	up	no	3.911	1.25308e-19	up	yes
b0729	sucD	succinyl-CoA synthetase subunit alpha	2.13	1.51408e-06	up	yes	3.409	3.67334e-18	up	yes
b0724	sdhB	succinate:quinone oxidoreductase%2C iron-sulfur cluster binding protein	1.328	0.18223	up	no	2.581	5.28301e-06	up	yes
b0721	sdhC	succinate:quinone oxidoreductase%2C membrane protein SdhC	2.231	9.64648e-06	up	yes	3.237	4.41641e-22	up	yes
b1612	fumA	fumarase A	2.661	0.00835407	up	yes	3.242	4.79737e-18	up	yes
b1611	fumC	fumarase C	2.348	3.71026e-05	up	yes	3.973	7.1213e-15	up	yes
b1109	ndh	NADH:quinone oxidoreductase II	0.471	1.93829e-06	down	yes	0.206	8.39633e-25	down	yes
b4592	appX	cytochrome bd-II accessory subunit AppX	0.494	0.0908922	down	yes	0.211	3.03648e-15	down	yes
b0978	appC	cytochrome bd-II subunit 1	0.422	7.87553e-10	down	yes	0.313	4.98794e-12	down	yes
b0979	appB	cytochrome bd-II subunit 2	0.42	0.00835112	down	yes	0.338	8.06212e-09	down	yes
b4602	cydH	cytochrome bd-I accessory subunit CydH	0.671	0.467665	down	no	0.476	1.7931e-05	down	yes

## Sheet: Table S2
Table S2 Differential metabolites of E. coli and S. enteritidis treated with CPF-Fe
Compound ID	Compound Name	Salmonella enteritidis					Escherichia coli
		VIP	Fold Change	p-value	Regulate	Significant	VIP	Fold Change	p-value	Regulate	Significant
C00127	Oxidized Glutathione	1.0105	0.4796	0.009837	down	yes	1.3005	0.423	0.026372	down	yes
C00669	Gamma-Glutamylcysteine	2.3553	0.4389	3.09e-11	down	yes	1.4767	0.3368	0.03894	down	yes
C01083	Trehalose	-	-	-	-	-	1.6835	0.4351	0.03166	down	yes
C01283	UDP-N-acetylmuraminate	1.3259	0.3733	0.0003245	down	yes	1.3758	0.4277	0.004129	down	yes
C00719	Betaine	-	-	-	-	-	1.0216	0.4399	0.0007599	down	yes
C00049	Aspartic Acid	2.1751	0.3805	6.16e-05	down	yes	2.2001	0.4003	2.061e-06	down	yes
C00025	L-Glutamate	1.3684	0.4744	0.02364	down	yes	1.5475	0.4324	0.02371	down	yes
C00082	L-Tyrosine	1.2809	0.4013	0.017	down	yes	1.138	0.4016	0.005286	down	yes
C00079	L-Phenylalanine	1.8076	1.0716	0.000935	up	no	1.2716	0.3785	0.0005866	down	yes
C00135	L-Histidine	1.2414	0.3795	0.004163	down	yes	1.0151	0.3986	0.0009753	down	yes
C00407	L-Isoleucine	1.2074	0.4108	0.03884	down	yes	1.2421	0.4131	0.01534	down	yes
C00149	Malic acid	1.2222	2.2461	0.002177	up	yes	1.5968	2.1678	0.0002504	up	yes
C00212	Adenosine	1.1298	0.393	0.0004603	down	yes	1.1574	0.4822	0.001781	down	yes
C00387	Guanosine	1.56	0.441	0.01684	down	yes	1.354	0.4089	0.03686	down	yes
C00299	Uridine	1.1563	0.3851	0.006453	down	yes	1.0243	0.4066	0.009439	down	yes
C00105	Uridine-5'-Monophosphate	1.4246	0.3741	0.03388	down	yes	2.02	0.3864	3.276e-05	down	yes
C00024	Acetyl-CoA	1.9882	0.4007	0.0006568	down	yes	2.2309	0.4469	6.827e-07	down	yes
C00015	Uridine 5'-diphosphate	-	-	-	-	-	1.7656	0.4062	0.006167	down	yes
C01367	Adenosine 3'-monophosphate	1.7582	0.3485	0.0005131	down	yes	1.8642	0.4198	0.0001434	down	yes
C03319	Deoxythymidine diphosphate-L-rhamnose	1.8738	0.4069	0.01554	down	yes	-	-	-	-	-
